# Supplementary material
Source: PubMed Central journal article supplement (PMC2759274)
Supplement: NIHMS145537-supplement-Supp_Tables.pdf [file NIHMS145537-supplement-Supp_Tables.pdf]

TABLE S1. *P. aeruginosa* genes expressed two-fold or greater when grown to mid-log phase in LB supplemented with oleate (C<sub>18:1</sub><sup>Δ9</sup>) versus LB as identified using microarray.

| Accession Number | Gene        | Fold Change <sup>1</sup> | Description                                                                                 |
|------------------|-------------|--------------------------|---------------------------------------------------------------------------------------------|
| PA0002           | <i>dnaN</i> | 2.1                      | DNA polymerase III, beta chain                                                              |
| PA0014           |             | 2.5                      | hypothetical protein                                                                        |
| PA0015           |             | 2.4                      | hypothetical protein (COG predictions: putative Zn-dependent protease)                      |
| PA0016           | <i>trkA</i> | 2.6                      | potassium uptake protein TrkA                                                               |
| PA0069           | <i>spIB</i> | 2.5                      | SpIB (COG predictions: DNA repair photolyase)                                               |
| PA0105           | <i>coxB</i> | 3.5                      | cytochrome c oxidase, subunit II                                                            |
| PA0141           |             | 2.7                      | conserved hypothetical protein                                                              |
| PA0169           |             | 4.1                      | hypothetical protein                                                                        |
| PA0170           |             | 2.6                      | hypothetical protein                                                                        |
| PA0172           | <i>rsbU</i> | 2.4                      | RsbU (COG prediction: serine phosphatase RsbU, regulator of sigma subunit)                  |
| PA0195           | <i>pntA</i> | 8.0                      | still frameshift pyridine nucleotide transhydrogenase alpha subunit                         |
| PA0196           | <i>pntB</i> | 8.8                      | pyridine nucleotide transhydrogenase, beta subunit                                          |
| PA0257           | <i>tra5</i> | 2.3                      | Tra5 (COG prediction: transposase and inactivated derivatives)                              |
| PA0276           |             | 2.4                      | hypothetical protein                                                                        |
| PA0277           | <i>htpX</i> | 2.1                      | HtpX (COG prediction: Zn-dependent protease with chaperone function)                        |
| PA0329           |             | 2.0                      | conserved hypothetical protein                                                              |
| PA0383           |             | 4.8                      | conserved hypothetical protein                                                              |
| PA0384           |             | 2.4                      | hypothetical protein                                                                        |
| PA0389           | <i>ubiE</i> | 2.2                      | UbiE (COG prediction: methylase involved in ubiquinone/menaquinone biosynthesis)            |
| PA0427           | <i>oprM</i> | 2.1                      | Major intrinsic multiple antibiotic resistance efflux outer membrane protein OprM precursor |
| PA0430           | <i>metF</i> | 2.1                      | 5,10-methylenetetrahydrofolate reductase                                                    |
| PA0431           | <i>spoT</i> | 2.1                      | SpoT (COG prediction: guanosine polyphosphate pyrophosphohydrolases/synthetases)            |
| PA0471           | <i>fiuR</i> | 2.8                      | probable transmembrane sensor                                                               |
| PA0506           | <i>fadE</i> | 15.9                     | probable acyl-CoA dehydrogenase                                                             |
| PA0508           | <i>fadE</i> | 15.6                     | probable acyl-CoA dehydrogenase                                                             |
| PA0513           | <i>nirG</i> | 2.5                      | probable transcriptional regulator                                                          |
| PA0514           | <i>nirL</i> | 2.9                      | heme d1 biosynthesis protein NirL                                                           |
| PA0515           | <i>nirD</i> | 2.7                      | probable transcriptional regulator                                                          |
| PA0517           | <i>nirC</i> | 4.8                      | probable c-type cytochrome precursor                                                        |
| PA0518           | <i>nirM</i> | 5.6                      | cytochrome c-551 precursor                                                                  |
| PA0519           | <i>nirS</i> | 5.8                      | nitrite reductase precursor                                                                 |
| PA0524           | <i>norB</i> | 4.3                      | nitric-oxide reductase subunit B                                                            |
| PA0525           | <i>norD</i> | 2.1                      | probable dinitrification protein NorD                                                       |
| PA0527           | <i>dnr</i>  | 2.5                      | transcriptional regulator Dnr                                                               |
| PA0546           | <i>metK</i> | 2.1                      | methionine adenosyltransferase                                                              |

---

|        |             |     |                                                                                     |
|--------|-------------|-----|-------------------------------------------------------------------------------------|
| PA0557 |             | 3.0 | hypothetical protein                                                                |
| PA0586 | <i>ycgB</i> | 2.4 | conserved hypothetical protein                                                      |
| PA0612 | <i>ptrB</i> | 2.3 | repressor, PtrB                                                                     |
| PA0613 |             | 2.3 | hypothetical protein                                                                |
| PA0629 |             | 2.0 | conserved hypothetical protein                                                      |
| PA0632 |             | 2.0 | hypothetical protein                                                                |
| PA0637 |             | 2.8 | conserved hypothetical protein                                                      |
| PA0638 |             | 2.1 | probable bacteriophage protein                                                      |
| PA0643 |             | 2.0 | hypothetical protein                                                                |
| PA0645 |             | 3.2 | hypothetical protein                                                                |
| PA0654 | <i>speD</i> | 2.1 | S-adenosylmethionine decarboxylase proenzyme                                        |
| PA0672 | <i>hemO</i> | 3.4 | heme oxygenase                                                                      |
| PA0705 | <i>migA</i> | 2.0 | alpha-1,6-rhamnosyltransferase MigA                                                 |
| PA0772 | <i>recO</i> | 2.0 | DNA repair protein RecO                                                             |
| PA0910 |             | 2.1 | hypothetical protein                                                                |
| PA0914 |             | 2.1 | hypothetical protein                                                                |
| PA0915 |             | 2.0 | conserved hypothetical protein                                                      |
| PA0916 | <i>miaB</i> | 2.1 | MiaB (COG prediction: 2-methylthioadenine synthetase)                               |
| PA0924 |             | 2.7 | hypothetical protein                                                                |
| PA0925 | <i>hslJ</i> | 2.1 | HslJ (COG prediction: heat shock protein)                                           |
| PA0927 | <i>ldhA</i> | 2.0 | D-lactate dehydrogenase (fermentative)                                              |
| PA0929 | <i>pirR</i> | 2.3 | two-component response regulator                                                    |
| PA0931 | <i>pirA</i> | 2.8 | ferric enterobactin receptor PirA                                                   |
| PA0975 |             | 2.8 | probable radical activating enzyme                                                  |
| PA0976 |             | 2.9 | conserved hypothetical protein ; tRNA-Lys                                           |
| PA0977 |             | 4.9 | hypothetical protein                                                                |
| PA0978 |             | 2.0 | conserved hypothetical protein                                                      |
| PA0983 |             | 2.2 | conserved hypothetical protein                                                      |
| PA0997 | <i>pqsB</i> | 4.5 | Homologous to beta-keto-acyl-acyl-carrier protein synthase                          |
| PA0998 | <i>pqsC</i> | 3.2 | Homologous to beta-keto-acyl-acyl-carrier protein synthase                          |
| PA0999 | <i>pqsD</i> | 2.2 | 3-oxoacyl-[acyl-carrier-protein] synthase III                                       |
| PA1002 | <i>phnB</i> | 2.4 | anthranilate synthase component II                                                  |
| PA1012 | <i>yycJ</i> | 2.4 | PhnP (COG prediction: metal-dependent hydrolases of the beta-lactamase superfamily) |
| PA1103 | <i>fliH</i> | 2.1 | probable flagellar assembly protein                                                 |
| PA1117 |             | 2.2 | hypothetical protein                                                                |
| PA1161 | <i>rrmA</i> | 2.1 | rRNA methyltransferase                                                              |
| PA1180 | <i>phoQ</i> | 2.4 | two-component sensor PhoQ                                                           |
| PA1242 | <i>aprE</i> | 2.1 | AprE (COG prediction: subtilisin-like serine proteases)                             |
| PA1273 | <i>cobB</i> | 2.1 | cobyrinic acid a,c-diamide synthase                                                 |
| PA1301 |             | 2.0 | probable transmembrane sensor                                                       |
| PA1302 | <i>hxuC</i> | 2.7 | probable heme utilization protein precursor                                         |

---

---

|        |              |       |                                                                        |
|--------|--------------|-------|------------------------------------------------------------------------|
| PA1317 | <i>cyoA</i>  | 2.1   | cytochrome o ubiquinol oxidase subunit II                              |
| PA1318 | <i>cyoB</i>  | 2.5   | cytochrome o ubiquinol oxidase subunit I                               |
| PA1319 | <i>cyoC</i>  | 2.0   | cytochrome o ubiquinol oxidase subunit III                             |
| PA1320 | <i>cyoD</i>  | 3.3   | cytochrome o ubiquinol oxidase subunit IV                              |
| PA1370 |              | 2.2   | hypothetical protein                                                   |
| PA1414 |              | 2.3   | hypothetical protein                                                   |
| PA1421 | <i>speB2</i> | 2.4   | guanidinobutyrase                                                      |
| PA1479 | <i>ccmE</i>  | 2.3   | cytochrome C-type biogenesis protein CcmE                              |
| PA1546 | <i>hemN</i>  | 3.4   | oxygen-independent coproporphyrinogen III oxidase                      |
| PA1549 | <i>fixI</i>  | 2.1   | probable cation-transporting P-type ATPase                             |
| PA1550 |              | 2.1   | hypothetical protein                                                   |
| PA1552 |              | 2.3   | probable cytochrome c                                                  |
| PA1556 | <i>fixO</i>  | 2.0   | probable cytochrome c oxidase subunit                                  |
| PA1557 | <i>fixN</i>  | 3.4   | probable cytochrome oxidase subunit (cbb3-type)                        |
| PA1560 |              | 2.2   | hypothetical protein                                                   |
| PA1614 | <i>gpsA</i>  | 2.1   | glycerol-3-phosphate dehydrogenase, biosynthetic                       |
| PA1673 |              | 2.6   | hypothetical protein                                                   |
| PA1747 |              | 3.4   | hypothetical protein                                                   |
| PA1748 |              | 4.0   | probable enoyl-CoA hydratase/isomerase                                 |
| PA1766 |              | 2.2   | hypothetical protein                                                   |
| PA1816 | <i>dnaQ</i>  | 2.1   | DNA polymerase III, epsilon chain                                      |
| PA1830 |              | 3.0   | hypothetical protein                                                   |
| PA1882 |              | 2.7   | probable transporter                                                   |
| PA1926 |              | 2.2   | conserved hypothetical protein                                         |
| PA1970 |              | 3.1   | hypothetical protein                                                   |
| PA1971 | <i>braZ</i>  | 3.7   | branched chain amino acid transporter BraZ                             |
| PA2018 | <i>mexY</i>  | 2.6   | Resistance-Nodulation-Cell Division (RND) multidrug efflux transporter |
| PA2022 |              | 2.9   | probable nucleotide sugar dehydrogenase                                |
| PA2077 |              | 73.0  | hypothetical protein                                                   |
| PA2078 |              | 146.2 | hypothetical protein                                                   |
| PA2119 | <i>adh</i>   | 3.0   | alcohol dehydrogenase (Zn-dependent)                                   |
| PA2231 | <i>psIA</i>  | 2.9   | probable glycosyl transferase                                          |
| PA2232 | <i>psIB</i>  | 2.4   | probable phosphomannose isomerase/GDP-mannose pyrophosphorylase        |
| PA2233 | <i>psIC</i>  | 3.1   | probable glycosyl transferase                                          |
| PA2234 | <i>psID</i>  | 3.0   | probable exopolysaccharide transporter                                 |
| PA2235 | <i>psIE</i>  | 2.7   | hypothetical protein                                                   |
| PA2236 | <i>psIF</i>  | 3.7   | hypothetical protein                                                   |
| PA2237 | <i>psIG</i>  | 2.6   | probable glycosyl hydrolase                                            |
| PA2238 | <i>psIH</i>  | 2.5   | hypothetical protein                                                   |
| PA2239 | <i>psII</i>  | 2.8   | probable transferase                                                   |
| PA2240 | <i>psIJ</i>  | 2.5   | hypothetical protein                                                   |

---

---

|        |             |     |                                                                     |
|--------|-------------|-----|---------------------------------------------------------------------|
| PA2242 | <i>psL</i>  | 2.3 | hypothetical protein                                                |
| PA2287 |             | 2.5 | hypothetical protein                                                |
| PA2385 | <i>pvdQ</i> | 2.7 | 3-oxo-C12-homoserine lactone acylase PvdQ                           |
| PA2386 | <i>pvdA</i> | 3.0 | L-ornithine N5-oxygenase                                            |
| PA2389 | <i>acrA</i> | 2.6 | AcrA (COG prediction: membrane-fusion protein)                      |
| PA2393 |             | 3.7 | probable dipeptidase precursor                                      |
| PA2394 | <i>pvdN</i> | 3.2 | PvdN                                                                |
| PA2395 | <i>pvdO</i> | 2.7 | PvdO                                                                |
| PA2397 | <i>pvdE</i> | 3.5 | pyoverdine biosynthesis protein PvdE                                |
| PA2411 |             | 2.1 | probable thioesterase                                               |
| PA2424 | <i>pvdL</i> | 3.1 | PvdL                                                                |
| PA2426 | <i>pvdS</i> | 3.8 | sigma factor PvdS                                                   |
| PA2441 |             | 2.9 | hypothetical protein                                                |
| PA2452 |             | 2.7 | hypothetical protein                                                |
| PA2458 | <i>rhsA</i> | 5.6 | RhsA (COG prediction: Rhs family protein)                           |
| PA2567 |             | 2.0 | hypothetical protein                                                |
| PA2609 | <i>trpD</i> | 2.1 | TrpD (COG prediction: anthranilate phosphoribosyltransferase)       |
| PA2618 |             | 2.1 | hypothetical protein                                                |
| PA2619 | <i>infA</i> | 3.2 | initiation factor                                                   |
| PA2630 | <i>ycfD</i> | 2.2 | conserved hypothetical protein                                      |
| PA2631 | <i>yjcF</i> | 2.0 | probable acetyl transferase                                         |
| PA2633 | <i>pulD</i> | 2.0 | PulD (COG prediction: type II secretory pathway, component PulD)    |
| PA2634 | <i>aceA</i> | 6.2 | probable isocitrate lyase                                           |
| PA2662 |             | 2.1 | conserved hypothetical protein                                      |
| PA2663 |             | 3.0 | hypothetical protein                                                |
| PA2688 | <i>pfeA</i> | 2.6 | Ferric enterobactin receptor, outer membrane protein PfeA precursor |
| PA2693 | <i>vdID</i> | 2.0 | conserved hypothetical protein                                      |
| PA2706 |             | 2.8 | hypothetical protein                                                |
| PA2707 |             | 2.8 | hypothetical protein                                                |
| PA2730 |             | 2.2 | hypothetical protein                                                |
| PA2732 |             | 2.7 | hypothetical protein                                                |
| PA2733 |             | 2.4 | conserved hypothetical protein                                      |
| PA2734 | <i>hsdS</i> | 2.9 | HsdS (COG prediction: restriction endonuclease S subunits)          |
| PA2735 |             | 2.5 | probable restriction-modification system protein                    |
| PA2737 |             | 2.1 | conserved hypothetical protein                                      |
| PA2791 |             | 2.3 | hypothetical protein                                                |
| PA2808 | <i>ptrA</i> | 2.7 | two-component response repressor, PtrA                              |
| PA2814 |             | 7.8 | hypothetical protein                                                |
| PA2821 |             | 2.0 | probable glutathione S-transferase                                  |
| PA2840 | <i>deaD</i> | 3.2 | probable ATP-dependent RNA helicase                                 |
| PA2882 |             | 2.1 | probable two-component sensor                                       |

---

---

|        |              |     |                                                                                   |
|--------|--------------|-----|-----------------------------------------------------------------------------------|
| PA2899 |              | 3.0 | probable transcriptional regulator                                                |
| PA2951 | <i>effA</i>  | 2.0 | electron transfer flavoprotein alpha-subunit                                      |
| PA2953 | <i>fixC</i>  | 3.8 | electron transfer flavoprotein-ubiquinone oxidoreductase                          |
| PA2960 | <i>pilZ</i>  | 2.0 | type 4 fimbrial biogenesis protein PilZ                                           |
| PA2963 | <i>yceG</i>  | 2.0 | conserved hypothetical protein                                                    |
| PA3001 |              | 2.5 | probable glyceraldehyde-3-phosphate dehydrogenase                                 |
| PA3006 | <i>psrA</i>  | 2.9 | transcriptional regulator PsrA                                                    |
| PA3009 |              | 2.3 | hypothetical protein                                                              |
| PA3012 |              | 5.9 | hypothetical protein                                                              |
| PA3013 | <i>fadA5</i> | 9.4 | fatty-acid oxidation complex beta-subunit                                         |
| PA3014 | <i>fadB5</i> | 7.5 | fatty-acid oxidation complex alpha-subunit                                        |
| PA3049 | <i>rmf</i>   | 3.3 | ribosome modulation factor                                                        |
| PA3059 | <i>peIF</i>  | 3.3 | PeIF                                                                              |
| PA3061 | <i>peID</i>  | 3.3 | PeID                                                                              |
| PA3064 | <i>peIA</i>  | 4.3 | PeIA                                                                              |
| PA3070 |              | 2.1 | conserved hypothetical protein                                                    |
| PA3092 | <i>fadH1</i> | 4.2 | 2,4-dienoyl-CoA reductase FadH1                                                   |
| PA3136 |              | 4.7 | probable secretion protein                                                        |
| PA3137 |              | 5.6 | probable major facilitator superfamily (MFS) transporter                          |
| PA3143 |              | 2.3 | hypothetical protein                                                              |
| PA3165 | <i>hisC2</i> | 2.0 | histidinol-phosphate aminotransferase                                             |
| PA3172 |              | 2.3 | probable hydrolase                                                                |
| PA3173 | <i>yciK</i>  | 2.0 | probable short-chain dehydrogenase                                                |
| PA3179 | <i>yciL</i>  | 2.4 | conserved hypothetical protein                                                    |
| PA3268 |              | 3.3 | probable TonB-dependent receptor                                                  |
| PA3289 |              | 2.0 | hypothetical protein                                                              |
| PA3309 | <i>uspK</i>  | 2.4 | UspK, Usp-type stress protein essential for survival during pyruvate fermentation |
| PA3328 |              | 2.2 | probable FAD-dependent monooxygenase                                              |
| PA3337 | <i>rfaD</i>  | 2.1 | ADP-L-glycero-D-mannoheptose 6-epimerase                                          |
| PA3340 | <i>fimV</i>  | 2.0 | FimV (COG prediction: Tfp pilus assembly protein)                                 |
| PA3392 | <i>nosZ</i>  | 4.5 | nitrous-oxide reductase precursor                                                 |
| PA3393 | <i>nosD</i>  | 2.5 | NosD protein                                                                      |
| PA3395 | <i>nosY</i>  | 2.3 | NosY protein                                                                      |
| PA3411 |              | 2.5 | hypothetical protein                                                              |
| PA3436 |              | 2.7 | hypothetical protein                                                              |
| PA3439 | <i>folX</i>  | 2.5 | d-erythro-7,8-dihydroneopterin triphosphate epimerase                             |
| PA3452 | <i>mqaA</i>  | 2.4 | malate:quinone oxidoreductase                                                     |
| PA3483 |              | 2.2 | hypothetical protein                                                              |
| PA3547 | <i>algL</i>  | 2.4 | poly(beta-d-mannuronate) lyase precursor AlgL                                     |
| PA3553 | <i>arnC</i>  | 2.4 | probable glycosyl transferase                                                     |
| PA3555 | <i>arnD</i>  | 2.5 | conserved hypothetical protein                                                    |

---

---

|        |              |     |                                                                                              |
|--------|--------------|-----|----------------------------------------------------------------------------------------------|
| PA3556 | <i>arnT</i>  | 2.3 | inner membrane L-Ara4N transferase ArnT                                                      |
| PA3559 |              | 2.8 | probable nucleotide sugar dehydrogenase                                                      |
| PA3564 | <i>tatD</i>  | 2.2 | TatD (COG prediction: Mg-dependent DNase)                                                    |
| PA3579 |              | 2.4 | probable carbohydrate kinase                                                                 |
| PA3600 |              | 2.2 | conserved hypothetical protein                                                               |
| PA3607 | <i>potA</i>  | 2.2 | polyamine transport protein PotA                                                             |
| PA3608 | <i>potB</i>  | 4.2 | polyamine transport protein PotB                                                             |
| PA3609 | <i>potC</i>  | 3.9 | polyamine transport protein PotC                                                             |
| PA3610 | <i>potD</i>  | 6.0 | polyamine transport protein PotD                                                             |
| PA3613 |              | 2.8 | hypothetical protein                                                                         |
| PA3636 | <i>kdsA</i>  | 2.2 | 2-dehydro-3-deoxyphosphooctonate aldolase                                                    |
| PA3640 | <i>dnaE</i>  | 2.2 | DNA polymerase III, alpha chain                                                              |
| PA3720 |              | 2.2 | hypothetical protein                                                                         |
| PA3741 |              | 3.8 | hypothetical protein                                                                         |
| PA3767 | <i>cumB</i>  | 2.4 | CumB (COG prediction: cytosine/adenosine deaminases)                                         |
| PA3784 |              | 2.3 | hypothetical protein                                                                         |
| PA3799 |              | 2.1 | conserved hypothetical protein                                                               |
| PA3835 |              | 3.3 | hypothetical protein                                                                         |
| PA3839 |              | 2.2 | probable sodium:sulfate symporter                                                            |
| PA3874 | <i>narH</i>  | 2.4 | respiratory nitrate reductase beta chain                                                     |
| PA3877 | <i>narK1</i> | 3.1 | nitrite extrusion protein 1                                                                  |
| PA3901 | <i>fecA</i>  | 2.8 | Fe(III) dicitrate transport protein FecA                                                     |
| PA3930 | <i>cioA</i>  | 2.8 | cyanide insensitive terminal oxidase                                                         |
| PA3957 |              | 2.1 | probable short-chain dehydrogenase                                                           |
| PA3964 |              | 2.7 | hypothetical protein                                                                         |
| PA3990 |              | 2.6 | conserved hypothetical protein                                                               |
| PA4011 |              | 2.2 | hypothetical protein                                                                         |
| PA4033 |              | 2.2 | hypothetical protein                                                                         |
| PA4052 | <i>nusB</i>  | 2.0 | NusB protein                                                                                 |
| PA4054 | <i>ribB</i>  | 2.1 | GTP cyclohydrolase II / 3,4-dihydroxy-2-butanone 4-phosphate synthase                        |
| PA4112 |              | 2.0 | probable sensor/response regulator hybrid                                                    |
| PA4113 | <i>ydeA</i>  | 2.4 | probable major facilitator superfamily (MFS) transporter                                     |
| PA4114 | <i>bltD</i>  | 2.4 | spermidine acetyltransferase                                                                 |
| PA4137 | <i>opdL</i>  | 2.3 | probable porin                                                                               |
| PA4139 |              | 2.2 | hypothetical protein                                                                         |
| PA4155 |              | 2.1 | hypothetical protein                                                                         |
| PA4161 | <i>fepG</i>  | 2.5 | ferric enterobactin transport protein FepG                                                   |
| PA4167 | <i>yafB</i>  | 7.7 | probable oxidoreductase                                                                      |
| PA4328 | <i>uspA</i>  | 3.2 | UspA (COG prediction: universal stress protein UspA and related nucleotide-binding proteins) |
| PA4358 |              | 2.0 | probable ferrous iron transport protein                                                      |

---

|        |              |      |                                                                                                                     |
|--------|--------------|------|---------------------------------------------------------------------------------------------------------------------|
| PA4359 |              | 2.4  | conserved hypothetical protein                                                                                      |
| PA4405 |              | 2.4  | hypothetical protein                                                                                                |
| PA4454 | <i>ttg2C</i> | 2.2  | Ttg2C (COG prediction: ABC-type transport system involved in resistance to organic solvents, periplasmic component) |
| PA4459 |              | 2.2  | conserved hypothetical protein                                                                                      |
| PA4461 | <i>yhbG</i>  | 2.1  | probable ATP-binding component of ABC transporter                                                                   |
| PA4467 |              | 2.7  | hypothetical protein                                                                                                |
| PA4468 | <i>sodM</i>  | 2.1  | superoxide dismutase                                                                                                |
| PA4469 |              | 3.0  | hypothetical protein                                                                                                |
| PA4470 | <i>fumC1</i> | 3.2  | fumarate hydratase                                                                                                  |
| PA4471 |              | 3.1  | hypothetical protein                                                                                                |
| PA4514 | <i>piuA</i>  | 5.9  | probable outer membrane receptor for iron transport                                                                 |
| PA4515 | <i>piuC</i>  | 2.7  | conserved hypothetical protein                                                                                      |
| PA4544 | <i>riuD</i>  | 2.3  | pseudouridine synthase                                                                                              |
| PA4571 |              | 2.0  | probable cytochrome c                                                                                               |
| PA4586 |              | 2.8  | hypothetical protein                                                                                                |
| PA4587 | <i>ccpR</i>  | 3.1  | cytochrome c551 peroxidase precursor                                                                                |
| PA4588 | <i>gdhA</i>  | 2.6  | glutamate dehydrogenase                                                                                             |
| PA4625 |              | 4.0  | hypothetical protein                                                                                                |
| PA4641 |              | 3.0  | still frameshift hypothetical protein                                                                               |
| PA4644 |              | 2.8  | hypothetical protein                                                                                                |
| PA4648 |              | 3.0  | hypothetical protein                                                                                                |
| PA4689 |              | 2.2  | hypothetical protein                                                                                                |
| PA4709 | <i>phuS</i>  | 2.1  | probable heme degrading factor                                                                                      |
| PA4710 | <i>phuR</i>  | 10.4 | Haem/Haemoglobin uptake outer membrane receptor PhuR precursor                                                      |
| PA4711 |              | 2.2  | hypothetical protein                                                                                                |
| PA4728 | <i>folK</i>  | 2.1  | 2-amino-4-hydroxy-6-hydroxymethylidihydropteridine pyrophosphokinase                                                |
| PA4757 | <i>rhtB</i>  | 2.0  | RhtB (COG prediction: putative threonine efflux protein)                                                            |
| PA4770 | <i>lldP</i>  | 5.7  | L-lactate permease                                                                                                  |
| PA4771 | <i>lldD</i>  | 11.2 | L-lactate dehydrogenase                                                                                             |
| PA4772 |              | 7.1  | probable ferredoxin                                                                                                 |
| PA4777 | <i>pmrB</i>  | 2.0  | PmrB: two-component regulator system signal sensor kinase PmrB                                                      |
| PA4839 | <i>speA</i>  | 2.4  | biosynthetic arginine decarboxylase                                                                                 |
| PA4843 |              | 2.1  | probable two-component response regulator                                                                           |
| PA4853 | <i>fis</i>   | 2.6  | DNA-binding protein Fis                                                                                             |
| PA4854 | <i>purH</i>  | 2.2  | phosphoribosylaminoimidazolecarboxamide formyltransferase                                                           |
| PA4855 | <i>purD</i>  | 2.6  | phosphoribosylamine--glycine ligase                                                                                 |
| PA4895 |              | 2.8  | probable transmembrane sensor                                                                                       |
| PA4962 |              | 2.5  | conserved hypothetical protein                                                                                      |
| PA4995 |              | 2.9  | probable acyl-CoA dehydrogenase                                                                                     |
| PA5012 | <i>waaF</i>  | 2.0  | heptosyltransferase II                                                                                              |

|        |              |     |                                                                                              |
|--------|--------------|-----|----------------------------------------------------------------------------------------------|
| PA5019 | <i>comJ</i>  | 2.1 | ComJ (COG prediction: protein involved in catabolism of external DNA)                        |
| PA5027 | <i>uspA</i>  | 2.6 | UspA (COG prediction: universal stress protein UspA and related nucleotide-binding proteins) |
| PA5030 |              | 2.9 | probable major facilitator superfamily (MFS) transporter                                     |
| PA5035 | <i>gltD</i>  | 3.5 | glutamate synthase small chain                                                               |
| PA5036 | <i>gltB</i>  | 3.5 | glutamate synthase large chain precursor                                                     |
| PA5072 |              | 2.4 | probable chemotaxis transducer                                                               |
| PA5117 | <i>typA</i>  | 2.2 | regulatory protein TypA                                                                      |
| PA5124 | <i>ntrB</i>  | 2.3 | two-component sensor NtrB                                                                    |
| PA5158 | <i>opmG</i>  | 2.9 | probable outer membrane protein precursor                                                    |
| PA5159 | <i>pmrA</i>  | 3.7 | multidrug resistance protein                                                                 |
| PA5160 | <i>pmrB</i>  | 2.8 | drug efflux transporter ; tRNA-Thr                                                           |
| PA5165 |              | 2.4 | probable two-component sensor                                                                |
| PA5170 | <i>arcD</i>  | 4.1 | arginine/ornithine antiporter                                                                |
| PA5171 | <i>arcA</i>  | 2.9 | arginine deiminase                                                                           |
| PA5172 | <i>arcB</i>  | 2.1 | ornithine carbamoyltransferase, catabolic                                                    |
| PA5199 | <i>envZ</i>  | 2.0 | two-component sensor EnvZ                                                                    |
| PA5202 |              | 2.4 | hypothetical protein                                                                         |
| PA5208 |              | 2.1 | conserved hypothetical protein                                                               |
| PA5232 | <i>emrA</i>  | 2.4 | EmrA (COG prediction: multidrug resistance efflux pump)                                      |
| PA5296 | <i>rep</i>   | 2.7 | ATP-dependent DNA helicase Rep                                                               |
| PA5298 | <i>xpt</i>   | 2.1 | xanthine phosphoribosyltransferase                                                           |
| PA5359 |              | 2.3 | hypothetical protein                                                                         |
| PA5407 |              | 2.2 | hypothetical protein                                                                         |
| PA5424 |              | 2.1 | conserved hypothetical protein                                                               |
| PA5427 | <i>adhA</i>  | 2.8 | alcohol dehydrogenase                                                                        |
| PA5435 | <i>oadA</i>  | 2.6 | probable transcarboxylase subunit                                                            |
| PA5436 |              | 2.4 | probable biotin carboxylase subunit of a transcarboxylase                                    |
| PA5440 | <i>yegQ</i>  | 2.6 | probable peptidase                                                                           |
| PA5475 |              | 2.4 | hypothetical protein                                                                         |
| PA5497 | <i>nrdJa</i> | 2.7 | class II (cobalamin-dependent) ribonucleotide-diphosphate reductase subunit, NrdJa           |
| PA5548 |              | 2.5 | probable major facilitator superfamily (MFS) transporter                                     |
| PA5553 | <i>atpC</i>  | 2.2 | ATP synthase epsilon chain                                                                   |
| PA5554 | <i>atpD</i>  | 2.0 | ATP synthase beta chain                                                                      |

<sup>1</sup>Fold change values were averaged over three different GeneChips<sup>®</sup> for each condition (LB and LB+0.2% oleate) with P-values ≤ 0.05.



TABLE S2. *P. aeruginosa* genes expressed two-fold or greater when grown to mid-log phase in LB versus LB supplemented with oleate (C<sub>18:1</sub><sup>Δ9</sup>) as identified using microarray.

| Accession Number | Gene         | Fold Change <sup>1</sup> | Description                                                                 |
|------------------|--------------|--------------------------|-----------------------------------------------------------------------------|
| PA0031           | <i>betC</i>  | 5.7                      | choline sulfatase                                                           |
| PA0048           |              | 2.5                      | probable transcriptional regulator                                          |
| PA0049           |              | 8.0                      | hypothetical protein                                                        |
| PA0129           | <i>gabP</i>  | 6.2                      | gamma-aminobutyrate permease                                                |
| PA0130           | <i>putA</i>  | 4.3                      | PutA (COG prediction: NAD-dependent aldehyde dehydrogenase)                 |
| PA0131           |              | 4.0                      | hypothetical protein                                                        |
| PA0132           | <i>oapT</i>  | 5.4                      | beta-alanine-pyruvate transaminase                                          |
| PA0186           | <i>atsR</i>  | 4.1                      | probable binding protein component of ABC transporter                       |
| PA0191           |              | 16.2                     | probable transcriptional regulator                                          |
| PA0197           | <i>tonB</i>  | 7.9                      | TonB (COG prediction: periplasmic protein, links inner and outer membranes) |
| PA0198           | <i>exbB1</i> | 10.8                     | transport protein ExbB                                                      |
| PA0201           |              | 15.2                     | hypothetical protein                                                        |
| PA0241           |              | 2.0                      | probable major facilitator superfamily (MFS) transporter                    |
| PA0280           | <i>cysA</i>  | 27.1                     | sulfate transport protein CysA                                              |
| PA0281           | <i>cysW</i>  | 32.8                     | sulfate transport protein CysW                                              |
| PA0282           | <i>cysT</i>  | 19.5                     | sulfate transport protein CysT                                              |
| PA0283           | <i>sbp</i>   | 14.4                     | sulfate-binding protein precursor                                           |
| PA0284           |              | 17.9                     | hypothetical protein                                                        |
| PA0291           | <i>oprE</i>  | 2.2                      | Anaerobically-induced outer membrane porin OprE precursor                   |
| PA0298           | <i>spuB</i>  | 2.0                      | probable glutamine synthetase                                               |
| PA0299           | <i>spuC</i>  | 3.4                      | putrescine aminotransferase                                                 |
| PA0304           | <i>potI</i>  | 2.1                      | polyamine transport protein PotI                                            |
| PA0364           |              | 6.1                      | probable oxidoreductase                                                     |
| PA0365           |              | 7.1                      | hypothetical protein                                                        |
| PA0366           |              | 4.6                      | probable aldehyde dehydrogenase                                             |
| PA0399           |              | 2.7                      | cystathionine beta-synthase                                                 |
| PA0400           | <i>metC</i>  | 2.1                      | probable cystathionine gamma-lyase                                          |
| PA0473           | <i>psfA</i>  | 3.5                      | probable glutathione S-transferase                                          |
| PA0492           | <i>yscF</i>  | 2.1                      | conserved hypothetical protein                                              |
| PA0493           |              | 5.8                      | probable biotin-requiring enzyme                                            |
| PA0494           |              | 5.2                      | probable acyl-CoA carboxylase subunit                                       |
| PA0495           |              | 5.4                      | hypothetical protein                                                        |
| PA0496           | <i>ybgK</i>  | 7.3                      | conserved hypothetical protein                                              |
| PA0602           |              | 3.0                      | probable binding protein component of ABC transporter                       |
| PA0730           |              | 2.6                      | probable transferase                                                        |
| PA0741           | <i>ywnB</i>  | 2.2                      | conserved hypothetical protein                                              |

---

|        |              |      |                                                           |
|--------|--------------|------|-----------------------------------------------------------|
| PA0742 |              | 4.1  | hypothetical protein                                      |
| PA0744 |              | 4.5  | probable enoyl-CoA hydratase/isomerase                    |
| PA0745 |              | 3.1  | probable enoyl-CoA hydratase/isomerase                    |
| PA0746 |              | 5.9  | probable acyl-CoA dehydrogenase                           |
| PA0752 |              | 2.1  | conserved hypothetical protein                            |
| PA0753 |              | 2.4  | hypothetical protein                                      |
| PA0754 |              | 2.1  | hypothetical protein                                      |
| PA0755 | <i>opdH</i>  | 2.6  | cis-aconitate porin OpdH                                  |
| PA0783 | <i>putP</i>  | 2.3  | sodium/proline symporter PutP                             |
| PA0789 |              | 9.5  | probable amino acid permease                              |
| PA0792 | <i>prpD</i>  | 2.9  | propionate catabolic protein PrpD                         |
| PA0793 |              | 3.9  | hypothetical protein                                      |
| PA0794 |              | 4.2  | probable aconitate hydratase                              |
| PA0795 | <i>prpC</i>  | 4.5  | citrate synthase 2                                        |
| PA0796 | <i>prpB</i>  | 4.9  | carboxyphosphoenolpyruvate phosphonmutase                 |
| PA0797 |              | 4.3  | probable transcriptional regulator                        |
| PA0830 |              | 10.7 | hypothetical protein                                      |
| PA0831 | <i>oruR</i>  | 2.5  | transcriptional regulator OruR                            |
| PA0839 |              | 2.5  | probable transcriptional regulator                        |
| PA0840 |              | 3.5  | probable oxidoreductase                                   |
| PA0841 |              | 3.7  | hypothetical protein                                      |
| PA0850 |              | 2.9  | hypothetical protein                                      |
| PA0852 | <i>cpbD</i>  | 2.4  | chitin-binding protein CbpD precursor                     |
| PA0865 | <i>hpd</i>   | 27.5 | 4-hydroxyphenylpyruvate dioxygenase                       |
| PA0866 | <i>aroP2</i> | 90.6 | aromatic amino acid transport protein AroP2               |
| PA0867 | <i>mliC</i>  | 6.1  | membrane-bound lysozyme inhibitor of c-type lysozyme MliC |
| PA0870 | <i>phhC</i>  | 5.9  | aromatic amino acid aminotransferase                      |
| PA0871 | <i>phhB</i>  | 3.4  | pterin-4- $\alpha$ -carbinolamine dehydratase             |
| PA0872 | <i>phhA</i>  | 7.9  | phenylalanine-4-hydroxylase                               |
| PA0887 | <i>acsA</i>  | 31.7 | acetyl-coenzyme A synthetase                              |
| PA1070 | <i>braG</i>  | 3.9  | branched-chain amino acid transport protein BraG          |
| PA1071 | <i>braF</i>  | 4.3  | branched-chain amino acid transport protein BraF          |
| PA1073 | <i>braD</i>  | 3.7  | branched-chain amino acid transport protein BraD          |
| PA1074 | <i>braC</i>  | 4.2  | branched-chain amino acid transport protein BraC          |
| PA1245 | <i>aprX</i>  | 3.3  | hypothetical protein                                      |
| PA1293 |              | 3.0  | hypothetical protein                                      |
| PA1337 | <i>ansB</i>  | 4.7  | glutaminase-asparaginase                                  |
| PA1338 | <i>ggt</i>   | 5.8  | gamma-glutamyltranspeptidase precursor                    |
| PA1339 |              | 2.3  | probable ATP-binding component of ABC transporter         |
| PA1340 |              | 2.9  | probable permease of ABC transporter                      |
| PA1341 |              | 2.9  | probable permease of ABC transporter                      |

---

---

|        |              |       |                                                            |
|--------|--------------|-------|------------------------------------------------------------|
| PA1342 |              | 2.8   | probable binding protein component of ABC transporter      |
| PA1409 | <i>aphA</i>  | 9.5   | acetylpolyamine aminohydrolase                             |
| PA1410 | <i>potF1</i> | 5.7   | probable periplasmic spermidine/putrescine-binding protein |
| PA1493 | <i>cysP</i>  | 3.2   | sulfate-binding protein of ABC transporter                 |
| PA1524 | <i>xdhA</i>  | 2.8   | xanthine dehydrogenase                                     |
| PA1537 |              | 4.2   | probable short-chain dehydrogenase                         |
| PA1538 |              | 3.1   | probable flavin-containing monooxygenase                   |
| PA1542 |              | 5.0   | hypothetical protein                                       |
| PA1632 | <i>kdpF</i>  | 6.2   | KdpF protein                                               |
| PA1634 | <i>kdpB</i>  | 4.3   | potassium-transporting ATPase, B chain                     |
| PA1635 | <i>kdpC</i>  | 3.9   | potassium-transporting ATPase, C chain                     |
| PA1649 |              | 3.5   | probable short-chain dehydrogenase                         |
| PA1694 | <i>pscQ</i>  | 2.0   | translocation protein in type III secretion                |
| PA1699 | <i>pcr1</i>  | 2.5   | conserved hypothetical protein in type III secretion       |
| PA1702 | <i>pcr4</i>  | 2.1   | conserved hypothetical protein in type III secretion       |
| PA1707 | <i>pcrH</i>  | 2.9   | regulatory protein PcrH                                    |
| PA1708 | <i>popB</i>  | 2.4   | translocator protein PopB                                  |
| PA1709 | <i>popD</i>  | 2.4   | Translocator outer membrane protein PopD precursor         |
| PA1710 | <i>exsC</i>  | 3.3   | exoenzyme S synthesis protein C precursor                  |
| PA1711 | <i>exsE</i>  | 2.7   | ExsC interacting protein                                   |
| PA1712 | <i>exsB</i>  | 2.7   | exoenzyme S synthesis protein B                            |
| PA1718 | <i>pscE</i>  | 2.1   | type III export protein PscE                               |
| PA1722 | <i>pscI</i>  | 2.1   | type III export protein PscI                               |
| PA1742 |              | 2.7   | probable amidotransferase                                  |
| PA1756 | <i>cysH</i>  | 3.5   | 3'-phosphoadenosine-5'-phosphosulfate reductase            |
| PA1759 |              | 2.9   | probable transcriptional regulator                         |
| PA1760 |              | 5.1   | probable transcriptional regulator                         |
| PA1761 |              | 3.1   | hypothetical protein                                       |
| PA1818 | <i>speC</i>  | 6.9   | probable Orn/Arg/Lys decarboxylase                         |
| PA1819 | <i>yjdE</i>  | 4.5   | probable amino acid permease                               |
| PA1837 |              | 5.1   | hypothetical protein                                       |
| PA1838 | <i>cysl</i>  | 4.5   | sulfite reductase                                          |
| PA1947 | <i>rbsA</i>  | 2.2   | ribose transport protein RbsA                              |
| PA1948 | <i>rbsC</i>  | 2.4   | membrane protein component of ABC ribose transporter       |
| PA1949 | <i>rbsR</i>  | 2.2   | ribose operon repressor RbsR                               |
| PA1978 | <i>agmR</i>  | 6.5   | probable transcriptional regulator                         |
| PA1984 | <i>exaC1</i> | 118.7 | probable aldehyde dehydrogenase                            |
| PA1985 | <i>pqqA</i>  | 4.0   | pyrroloquinoline quinone biosynthesis protein A            |
| PA1986 | <i>pqqB</i>  | 5.1   | pyrroloquinoline quinone biosynthesis protein B            |
| PA1987 | <i>pqqC</i>  | 4.5   | pyrroloquinoline quinone biosynthesis protein C            |
| PA1988 | <i>pqqD</i>  | 4.4   | pyrroloquinoline quinone biosynthesis protein D            |

---

|        |              |       |                                                                                  |
|--------|--------------|-------|----------------------------------------------------------------------------------|
| PA1989 | <i>pqqE</i>  | 3.7   | pyrroloquinoline quinone biosynthesis protein E                                  |
| PA1990 |              | 4.2   | probable peptidase                                                               |
| PA1991 |              | 3.8   | probable iron-containing alcohol dehydrogenase                                   |
| PA1992 |              | 3.2   | probable two-component sensor                                                    |
| PA1999 | <i>atoD</i>  | 73.8  | probable CoA transferase, subunit A                                              |
| PA2000 | <i>atoA</i>  | 116.9 | probable CoA transferase, subunit B                                              |
| PA2001 | <i>atoB</i>  | 48.1  | acetyl-CoA acetyltransferase                                                     |
| PA2002 | <i>atoE</i>  | 34.5  | AtoE (COG prediction: Short chain fatty acids transporter)                       |
| PA2003 | <i>bdhA</i>  | 6.2   | 3-hydroxybutyrate dehydrogenase                                                  |
| PA2004 | <i>gntT</i>  | 7.4   | GntT (COG prediction: H <sup>+</sup> /gluconate symporter and related permeases) |
| PA2006 |              | 34.9  | probable major facilitator superfamily (MFS) transporter                         |
| PA2007 | <i>maiA</i>  | 35.7  | maleylacetoacetate isomerase                                                     |
| PA2008 | <i>fahA</i>  | 59.4  | fumarylacetoacetase                                                              |
| PA2009 | <i>hmgA</i>  | 85.7  | homogentisate 1,2-dioxygenase                                                    |
| PA2012 | <i>liuD</i>  | 14.2  | alpha subunit of geranoyl-CoA carboxylase, GnyA                                  |
| PA2013 | <i>liuC</i>  | 12.0  | gamma-carboxygeranoyl-CoA hydratase, GnyH                                        |
| PA2014 | <i>liuB</i>  | 11.4  | beta subunit of geranoyl-CoA carboxylase, GnyB                                   |
| PA2015 | <i>liuA</i>  | 11.0  | Citronelloyl-CoA dehydrogenase, GnyD                                             |
| PA2016 | <i>liuR</i>  | 6.1   | Regulatory gene of gnyRDBHAL cluster, GnyR                                       |
| PA2041 |              | 4.4   | probable amino acid permease                                                     |
| PA2062 |              | 5.5   | probable pyridoxal-phosphate dependent enzyme                                    |
| PA2073 |              | 4.9   | probable transporter (membrane subunit)                                          |
| PA2079 |              | 3.5   | probable amino acid permease                                                     |
| PA2080 | <i>kynU</i>  | 2.0   | kynureninase KynU                                                                |
| PA2081 | <i>kynB</i>  | 2.7   | kynurenine formamidase, KynB                                                     |
| PA2083 |              | 3.9   | probable ring-hydroxylating dioxygenase subunit                                  |
| PA2109 |              | 13.6  | hypothetical protein                                                             |
| PA2110 |              | 11.4  | hypothetical protein                                                             |
| PA2111 |              | 13.3  | hypothetical protein                                                             |
| PA2112 |              | 11.0  | conserved hypothetical protein                                                   |
| PA2113 | <i>opdO</i>  | 20.1  | pyroglutamate porin OpdO                                                         |
| PA2114 |              | 26.3  | probable major facilitator superfamily (MFS) transporter                         |
| PA2116 |              | 5.4   | conserved hypothetical protein                                                   |
| PA2123 |              | 5.0   | probable transcriptional regulator                                               |
| PA2202 |              | 20.7  | probable amino acid permease                                                     |
| PA2203 |              | 20.2  | probable amino acid permease                                                     |
| PA2204 |              | 16.0  | probable binding protein component of ABC transporter                            |
| PA2247 | <i>bkdA1</i> | 31.0  | 2-oxoisovalerate dehydrogenase (alpha subunit)                                   |
| PA2248 | <i>bkdA2</i> | 19.1  | 2-oxoisovalerate dehydrogenase (beta subunit)                                    |
| PA2249 | <i>bkdB</i>  | 15.2  | branched-chain alpha-keto acid dehydrogenase (lipoamide component)               |
| PA2250 | <i>lpdV</i>  | 29.5  | lipoamide dehydrogenase-Val                                                      |

---

|        |              |      |                                                                                                         |
|--------|--------------|------|---------------------------------------------------------------------------------------------------------|
| PA2252 |              | 3.1  | probable AGCS sodium/alanine/glycine symporter                                                          |
| PA2258 | <i>ptxR</i>  | 2.9  | transcriptional regulator PtxR                                                                          |
| PA2310 | <i>tauD</i>  | 4.9  | TauD (COG prediction: probable taurine catabolism dioxygenase)                                          |
| PA2311 |              | 3.2  | hypothetical protein                                                                                    |
| PA2312 |              | 9.5  | probable transcriptional regulator                                                                      |
| PA2321 | <i>gntV</i>  | 2.6  | gluconokinase                                                                                           |
| PA2322 | <i>gntU</i>  | 7.0  | gluconate permease                                                                                      |
| PA2323 | <i>gapN</i>  | 2.3  | probable glyceraldehyde-3-phosphate dehydrogenase                                                       |
| PA2327 |              | 2.8  | probable permease of ABC transporter                                                                    |
| PA2329 |              | 3.1  | probable ATP-binding component of ABC transporter                                                       |
| PA2330 | <i>caiA</i>  | 4.0  | CaiA (COG prediction: acyl-CoA dehydrogenases)                                                          |
| PA2331 |              | 5.8  | hypothetical protein                                                                                    |
| PA2333 |              | 3.7  | probable sulfatase                                                                                      |
| PA2334 |              | 13.8 | probable transcriptional regulator                                                                      |
| PA2358 |              | 3.5  | hypothetical protein                                                                                    |
| PA2359 |              | 23.4 | probable transcriptional regulator                                                                      |
| PA2532 | <i>tpx</i>   | 2.9  | thiol peroxidase                                                                                        |
| PA2533 |              | 4.1  | probable sodium:alanine symporter                                                                       |
| PA2552 | <i>acdB</i>  | 6.7  | probable acyl-CoA dehydrogenase                                                                         |
| PA2553 |              | 17.3 | probable acyl-CoA thiolase                                                                              |
| PA2554 |              | 7.1  | probable short-chain dehydrogenase                                                                      |
| PA2555 |              | 5.9  | probable AMP-binding enzyme                                                                             |
| PA2557 |              | 16.6 | probable AMP-binding enzyme                                                                             |
| PA2575 |              | 2.3  | FMR2 (COG prediction: oxidoreductase related to nitroreductase)                                         |
| PA2594 | <i>tauA</i>  | 7.2  | TauA (COG prediction: ABC-type nitrate/sulfonate/bicarbonate transport systems, periplasmic components) |
| PA2597 | <i>caiA</i>  | 3.0  | CaiA (COG prediction: acyl-CoA dehydrogenases)                                                          |
| PA2598 |              | 6.5  | hypothetical protein                                                                                    |
| PA2599 | <i>tauA</i>  | 10.6 | TauA (COG prediction: ABC-type nitrate/sulfonate/bicarbonate transport systems, periplasmic components) |
| PA2600 |              | 5.7  | hypothetical protein                                                                                    |
| PA2602 |              | 2.4  | hypothetical protein                                                                                    |
| PA2679 | <i>ubiE</i>  | 3.1  | UbiE (COG prediction: methylase involved in ubiquinone/menaquinone biosynthesis)                        |
| PA2776 | <i>dadA</i>  | 3.1  | DadA (COG prediction: glycine/D-amino acid oxidases)                                                    |
| PA2779 |              | 2.2  | hypothetical protein                                                                                    |
| PA2862 | <i>lipA</i>  | 6.9  | lactonizing lipase precursor                                                                            |
| PA3025 | <i>glpD2</i> | 2.4  | probable FAD-dependent glycerol-3-phosphate dehydrogenase                                               |
| PA3026 | <i>glcD</i>  | 2.4  | GlcD (COG prediction: FAD/FMN-containing dehydrogenases)                                                |
| PA3038 | <i>opdQ</i>  | 18.0 | probable porin                                                                                          |
| PA3067 |              | 2.3  | probable transcriptional regulator                                                                      |
| PA3068 | <i>gdhB</i>  | 4.3  | NAD-dependent glutamate dehydrogenase                                                                   |

---

---

|        |              |       |                                                                                                         |
|--------|--------------|-------|---------------------------------------------------------------------------------------------------------|
| PA3181 | <i>edaA</i>  | 3.7   | 2-keto-3-deoxy-6-phosphogluconate aldolase                                                              |
| PA3182 | <i>pgl</i>   | 3.1   | 6-phosphogluconolactonase                                                                               |
| PA3183 | <i>zwf</i>   | 3.3   | glucose-6-phosphate 1-dehydrogenase                                                                     |
| PA3186 | <i>oprB</i>  | 4.9   | probable glucose-sensitive porin ; Glucose/carbohydrate outer membrane porin OprB precursor             |
| PA3187 | <i>gltK</i>  | 37.2  | probable ATP-binding component of ABC transporter                                                       |
| PA3188 | <i>gltG</i>  | 171.2 | probable permease of ABC sugar transporter                                                              |
| PA3189 | <i>gltF</i>  | 48.9  | probable permease of ABC sugar transporter                                                              |
| PA3190 | <i>gltB</i>  | 107.3 | probable binding protein component of ABC sugar transporter                                             |
| PA3191 |              | 3.0   | probable two-component sensor                                                                           |
| PA3192 | <i>gltR</i>  | 2.9   | two-component response regulator GltR                                                                   |
| PA3193 | <i>glk</i>   | 2.9   | glucokinase                                                                                             |
| PA3194 | <i>edd</i>   | 2.4   | phosphogluconate dehydratase                                                                            |
| PA3195 | <i>gapA</i>  | 17.7  | glyceraldehyde 3-phosphate dehydrogenase                                                                |
| PA3232 |              | 6.2   | probable nuclease                                                                                       |
| PA3233 |              | 29.1  | hypothetical protein                                                                                    |
| PA3234 | <i>yjcG</i>  | 62.0  | probable sodium:solute symporter                                                                        |
| PA3235 | <i>yjcH</i>  | 157.2 | conserved hypothetical protein                                                                          |
| PA3271 |              | 2.1   | probable two-component sensor                                                                           |
| PA3300 | <i>fadD2</i> | 3.7   | long-chain-fatty-acid-CoA ligase                                                                        |
| PA3355 | <i>araJ</i>  | 2.5   | AraJ (COG prediction: arabinose efflux permease)                                                        |
| PA3356 | <i>glnA</i>  | 4.7   | GlnA (COG prediction: glutamine synthetase)                                                             |
| PA3364 | <i>amiC</i>  | 3.6   | aliphatic amidase expression-regulating protein                                                         |
| PA3365 | <i>amiB</i>  | 5.7   | probable chaperone                                                                                      |
| PA3366 | <i>amiE</i>  | 3.7   | aliphatic amidase                                                                                       |
| PA3442 | <i>ycbE</i>  | 4.0   | probable ATP-binding component of ABC transporter                                                       |
| PA3443 | <i>ycbM</i>  | 8.6   | probable permease of ABC transporter                                                                    |
| PA3444 | <i>ssuD</i>  | 13.1  | conserved hypothetical protein                                                                          |
| PA3445 | <i>tauA</i>  | 12.1  | TauA (COG prediction: ABC-type nitrate/sulfonate/bicarbonate transport systems, periplasmic components) |
| PA3446 | <i>ssuE</i>  | 48.6  | conserved hypothetical protein                                                                          |
| PA3450 | <i>lsfA</i>  | 14.8  | probable antioxidant protein                                                                            |
| PA3454 |              | 2.2   | probable acyl-CoA thiolase                                                                              |
| PA3464 |              | 2.4   | hypothetical protein                                                                                    |
| PA3471 | <i>sfcA</i>  | 2.5   | probable malic enzyme                                                                                   |
| PA3501 |              | 2.2   | hypothetical protein                                                                                    |
| PA3502 |              | 2.3   | hypothetical protein                                                                                    |
| PA3505 |              | 2.1   | hypothetical protein                                                                                    |
| PA3507 |              | 2.1   | probable short-chain dehydrogenase                                                                      |
| PA3509 |              | 2.1   | probable hydrolase                                                                                      |
| PA3510 |              | 4.6   | hypothetical protein                                                                                    |

---

|        |             |       |                                                                                                         |
|--------|-------------|-------|---------------------------------------------------------------------------------------------------------|
| PA3513 | <i>tauA</i> | 6.1   | TauA (COG prediction: ABC-type nitrate/sulfonate/bicarbonate transport systems, periplasmic components) |
| PA3535 | <i>eprS</i> | 2.7   | probable serine protease                                                                                |
| PA3779 | <i>dctP</i> | 4.3   | DctP (COG prediction: TRAP-type C4-dicarboxylate transport system, periplasmic component)               |
| PA3780 | <i>dctM</i> | 9.8   | DctM (COG prediction: TRAP-type C4-dicarboxylate transport system, small permease component)            |
| PA3781 | <i>dctQ</i> | 6.4   | DctM (COG prediction: TRAP-type C4-dicarboxylate transport system, large permease component)            |
| PA3836 |             | 3.2   | hypothetical protein                                                                                    |
| PA3837 |             | 3.4   | probable permease of ABC transporter                                                                    |
| PA3838 |             | 3.1   | probable ATP-binding component of ABC transporter                                                       |
| PA3841 | <i>exoS</i> | 2.4   | exoenzyme S                                                                                             |
| PA3922 |             | 10.5  | conserved hypothetical protein                                                                          |
| PA3923 |             | 6.9   | hypothetical protein                                                                                    |
| PA3931 | <i>nlpA</i> | 37.1  | NlpA (COG prediction: ABC-type metal ion transport system, periplasmic component/surface antigen)       |
| PA3932 |             | 32.4  | probable transcriptional regulator                                                                      |
| PA3934 |             | 3.3   | conserved hypothetical protein                                                                          |
| PA3935 | <i>tauD</i> | 6.1   | taurine dioxygenase                                                                                     |
| PA3936 |             | 10.2  | probable permease of ABC taurine transporter                                                            |
| PA3937 | <i>tauB</i> | 10.5  | probable ATP-binding component of ABC taurine transporter                                               |
| PA3938 | <i>tauA</i> | 11.6  | probable periplasmic taurine-binding protein precursor                                                  |
| PA3939 |             | 3.8   | hypothetical protein                                                                                    |
| PA3959 |             | 2.5   | hypothetical protein                                                                                    |
| PA3960 |             | 2.6   | hypothetical protein                                                                                    |
| PA4014 |             | 2.5   | hypothetical protein                                                                                    |
| PA4015 | <i>maoC</i> | 2.2   | MaoC (COG prediction: acyl dehydratase)                                                                 |
| PA4021 | <i>acoR</i> | 5.9   | AcoR (COG prediction: transcriptional activator of acetoin/glycerol metabolism)                         |
| PA4023 | <i>eutP</i> | 117.5 | probable transport protein                                                                              |
| PA4024 | <i>eutB</i> | 40.3  | ethanolamine ammonia-lyase large subunit                                                                |
| PA4025 | <i>eutC</i> | 10.7  | probable ethanolamine ammonia-lyase light chain                                                         |
| PA4191 |             | 15.3  | probable iron/ascorbate oxidoreductase                                                                  |
| PA4192 |             | 33.4  | probable ATP-binding component of ABC transporter                                                       |
| PA4193 |             | 41.6  | probable permease of ABC transporter                                                                    |
| PA4194 |             | 34.1  | probable permease of ABC transporter                                                                    |
| PA4195 |             | 33.8  | probable binding protein component of ABC transporter                                                   |
| PA4198 |             | 10.4  | probable AMP-binding enzyme                                                                             |
| PA4199 |             | 3.5   | probable acyl-CoA dehydrogenase                                                                         |
| PA4200 | <i>gloB</i> | 2.3   | GloB (COG prediction: Zn-dependent hydrolases, including glyoxylases)                                   |
| PA4290 |             | 9.1   | probable chemotaxis transducer                                                                          |

|        |             |      |                                                                                                   |
|--------|-------------|------|---------------------------------------------------------------------------------------------------|
| PA4442 | <i>cysN</i> | 5.1  | ATP sulfurylase GTP-binding subunit/APS kinase                                                    |
| PA4443 | <i>cysD</i> | 8.4  | ATP sulfurylase small subunit                                                                     |
| PA4496 |             | 13.6 | probable binding protein component of ABC transporter                                             |
| PA4497 |             | 5.2  | probable binding protein component of ABC transporter                                             |
| PA4498 |             | 7.5  | probable metallopeptidase                                                                         |
| PA4500 |             | 13.0 | probable binding protein component of ABC transporter                                             |
| PA4501 | <i>opdD</i> | 19.1 | Glycine-glutamate dipeptide porin OpdP                                                            |
| PA4502 |             | 20.3 | probable binding protein component of ABC transporter                                             |
| PA4503 | <i>dppB</i> | 22.3 | probable permease of ABC transporter                                                              |
| PA4504 | <i>dppC</i> | 14.8 | probable permease of ABC transporter                                                              |
| PA4505 | <i>dppD</i> | 9.6  | probable ATP-binding component of ABC transporter                                                 |
| PA4506 | <i>dppF</i> | 10.6 | probable ATP-binding component of ABC dipeptide transporter                                       |
| PA4548 | <i>yfiT</i> | 2.0  | probable D-amino acid oxidase                                                                     |
| PA4590 | <i>pra</i>  | 2.5  | protein activator                                                                                 |
| PA4603 |             | 2.3  | hypothetical protein                                                                              |
| PA4604 |             | 2.8  | conserved hypothetical protein                                                                    |
| PA4605 |             | 5.5  | conserved hypothetical protein                                                                    |
| PA4606 | <i>cstA</i> | 7.4  | CstA (COG prediction: carbon starvation protein, predicted membrane protein)                      |
| PA4613 | <i>katB</i> | 2.3  | catalase                                                                                          |
| PA4661 | <i>pagL</i> | 3.2  | Lipid A 3-O-deacylase                                                                             |
| PA4733 | <i>acsB</i> | 4.7  | acetyl-coenzyme A synthetase                                                                      |
| PA4787 |             | 3.5  | probable transcriptional regulator                                                                |
| PA4847 | <i>accB</i> | 2.1  | biotin carboxyl carrier protein (BCCP)                                                            |
| PA4872 | <i>prpB</i> | 2.3  | PrpB (COG prediction: PEP phosphonmutase and related enzymes)                                     |
| PA4888 | <i>desB</i> | 22.8 | acyl-CoA delta-9-desaturase, DesB                                                                 |
| PA4890 | <i>desT</i> | 2.2  | DesT, transcriptional regulators                                                                  |
| PA4899 |             | 2.4  | probable aldehyde dehydrogenase                                                                   |
| PA4976 | <i>aspC</i> | 2.7  | aspartate transaminase                                                                            |
| PA4978 |             | 3.5  | hypothetical protein                                                                              |
| PA4979 |             | 5.3  | probable acyl-CoA dehydrogenase                                                                   |
| PA4986 |             | 2.3  | probable oxidoreductase                                                                           |
| PA5015 | <i>aceE</i> | 2.4  | pyruvate dehydrogenase                                                                            |
| PA5024 | <i>ytnM</i> | 16.9 | (COG prediction: permeases)                                                                       |
| PA5082 |             | 2.2  | probable binding protein component of ABC transporter                                             |
| PA5100 | <i>hutU</i> | 2.5  | urocanase                                                                                         |
| PA5101 | <i>phnD</i> | 3.9  | PhnD (COG prediction: ABC-type phosphate/phosphonate transport system, periplasmic component)     |
| PA5102 | <i>desA</i> | 8.6  | DesA (COG prediction: fatty acid desaturase)                                                      |
| PA5103 | <i>proX</i> | 17.9 | ProX (COG prediction: ABC-type proline/glycine betaine transport systems, periplasmic components) |
| PA5112 | <i>estA</i> | 3.0  | esterase EstA                                                                                     |



---

|        |              |      |                                                                                     |
|--------|--------------|------|-------------------------------------------------------------------------------------|
| PA5152 |              | 4.2  | probable ATP-binding component of ABC transporter                                   |
| PA5153 |              | 4.9  | probable periplasmic binding protein                                                |
| PA5154 |              | 8.9  | probable permease of ABC transporter                                                |
| PA5155 |              | 6.7  | probable permease of ABC transporter                                                |
| PA5167 |              | 3.4  | probable c4-dicarboxylate-binding protein                                           |
| PA5168 |              | 4.3  | probable dicarboxylate transporter                                                  |
| PA5169 |              | 4.2  | probable C4-dicarboxylate transporter                                               |
| PA5174 |              | 6.6  | probable beta-ketoacyl synthase                                                     |
| PA5188 |              | 2.1  | probable 3-hydroxyacyl-CoA dehydrogenase                                            |
| PA5212 |              | 5.7  | hypothetical protein                                                                |
| PA5302 | <i>dadX</i>  | 9.5  | catabolic alanine racemase                                                          |
| PA5303 | <i>tdcF</i>  | 7.9  | TdcF (COG prediction: Putative translation initiation inhibitor, yjgF family)       |
| PA5304 | <i>dadA</i>  | 8.0  | D-amino acid dehydrogenase, small subunit                                           |
| PA5312 | <i>kauB</i>  | 3.7  | probable aldehyde dehydrogenase                                                     |
| PA5348 |              | 3.4  | probable DNA-binding protein                                                        |
| PA5375 | <i>betT1</i> | 4.5  | choline transporter BetT                                                            |
| PA5377 |              | 2.4  | probable permease of ABC transporter                                                |
| PA5379 | <i>sdaB</i>  | 2.6  | L-serine dehydratase                                                                |
| PA5380 | <i>gbdR</i>  | 14.2 | probable transcriptional regulator                                                  |
| PA5396 |              | 6.6  | hypothetical protein                                                                |
| PA5397 |              | 12.8 | hypothetical protein                                                                |
| PA5398 | <i>dgcA</i>  | 8.0  | DgcA (COG prediction: dimethylglycine catabolism)                                   |
| PA5400 |              | 5.8  | probable electron transfer flavoprotein alpha subunit                               |
| PA5410 | <i>gbcA</i>  | 13.5 | glycine betaine catabolism protein                                                  |
| PA5411 | <i>gbcB</i>  | 3.8  | glycine betaine catabolism protein                                                  |
| PA5416 | <i>soxB</i>  | 13.1 | sarcosine oxidase beta subunit                                                      |
| PA5417 | <i>soxD</i>  | 8.5  | sarcosine oxidase delta subunit                                                     |
| PA5419 | <i>soxG</i>  | 8.3  | sarcosine oxidase gamma subunit                                                     |
| PA5420 | <i>purU2</i> | 7.6  | formyltetrahydrofolate deformylase                                                  |
| PA5421 | <i>fdhA</i>  | 4.0  | glutathione-independent formaldehyde dehydrogenase                                  |
| PA5429 | <i>aspA</i>  | 3.7  | aspartate ammonia-lyase                                                             |
| PA5442 |              | 3.7  | conserved hypothetical protein                                                      |
| PA5445 |              | 4.4  | probable coenzyme A transferase                                                     |
| PA5452 | <i>wbpW</i>  | 2.3  | phosphomannose isomerase/GDP-mannose WbpW                                           |
| PA5506 | <i>rpiR</i>  | 3.0  | RpiR (COG prediction: transcriptional regulators)                                   |
| PA5507 | <i>pncA</i>  | 4.0  | PncA (COG prediction: amidases related to nicotinamidase)                           |
| PA5508 |              | 4.2  | probable glutamine synthetase                                                       |
| PA5509 |              | 2.9  | hypothetical protein                                                                |
| PA5510 |              | 3.6  | probable transporter                                                                |
| PA5542 | <i>ampC</i>  | 3.0  | AmpC (COG prediction: beta-lactamase class C and other penicillin binding proteins) |
| PA5543 |              | 4.8  | hypothetical protein                                                                |

---

---

|        |            |     |                                                                                         |
|--------|------------|-----|-----------------------------------------------------------------------------------------|
| PA5544 |            | 2.5 | conserved hypothetical protein                                                          |
| PA5545 | <i>imp</i> | 3.9 | Imp (COG prediction: TRAP-type uncharacterized transport system, periplasmic component) |

---

<sup>1</sup>Fold change values were averaged over three different GeneChips<sup>®</sup> for each condition (LB and LB+0.2% oleate) with P-values  $\leq$  0.05.
